# Supplementary material for: Ethanolic extract of Ya-nang ( Tiliacora triandra ) leaf powder induces apoptosis in cholangiocarcinoma cell lines via induction of hyperacetylation and inhibition of growth signaling
Source: PeerJ journal article supplement (doi:10.7717/peerj.14518), 2022-12-15
Supplement: SPSS_data-revised.pdf [file SPSS_data-revised.pdf]

1. SPSS data of cell viability on KKU-M213B, KKU-100, and H69 cell lines.

1.1 KKU-M213B cells

1.1.1 24 h

ANOVA

KKU-M213B cells

|                | Sum of Squares | df | Mean Square | F      | Sig. |
|----------------|----------------|----|-------------|--------|------|
| Between Groups | 11603.526      | 5  | 2320.705    | 65.263 | .000 |
| Within Groups  | 213.354        | 6  | 35.559      |        |      |
| Total          | 11816.880      | 11 |             |        |      |

Duncan<sup>a</sup>

| TLPE extract    | N | Subset for alpha = 0.05 |         |         |         |          |
|-----------------|---|-------------------------|---------|---------|---------|----------|
|                 |   | 1                       | 2       | 3       | 4       | 5        |
| 500             | 2 | 8.5725                  |         |         |         |          |
| 250             | 2 |                         | 30.8670 |         |         |          |
| 125             | 2 |                         | 34.3990 |         |         |          |
| 62.5            | 2 |                         |         | 62.3005 |         |          |
| 31.25           | 2 |                         |         |         | 79.4120 |          |
| solvent control | 2 |                         |         |         |         | 100.0000 |
| Sig.            |   | 1.000                   | .575    | 1.000   | 1.000   | 1.000    |

Means for groups in homogeneous subsets are displayed.

a. Uses Harmonic Mean Sample Size = 2.000.

### 1.1.2 48 h

#### ANOVA

##### KKU-M213B cells

|                | Sum of Squares | df | Mean Square | F       | Sig. |
|----------------|----------------|----|-------------|---------|------|
| Between Groups | 26265.908      | 7  | 3752.273    | 197.363 | .000 |
| Within Groups  | 152.097        | 8  | 19.012      |         |      |
| Total          | 26418.005      | 15 |             |         |      |

##### Duncan<sup>a</sup>

| TLPE extract    | N | Subset for alpha = 0.05 |         |         |          |
|-----------------|---|-------------------------|---------|---------|----------|
|                 |   | 1                       | 2       | 3       | 4        |
| 12              | 2 | 1.1765                  |         |         |          |
| 15              | 2 | 1.3965                  |         |         |          |
| 30              | 2 | 1.4410                  |         |         |          |
| 10              | 2 | 1.9310                  |         |         |          |
| 9               | 2 |                         | 55.4655 |         |          |
| 7.5             | 2 |                         |         | 67.7045 |          |
| 3.75            | 2 |                         |         |         | 90.9185  |
| solvent control | 2 |                         |         |         | 100.0000 |
| Sig.            |   | .874                    | 1.000   | 1.000   | .071     |

Means for groups in homogeneous subsets are displayed.

a. Uses Harmonic Mean Sample Size = 2.000.

### 1.1.3 72 h

#### ANOVA

##### KKU-M213B cells

|                | Sum of Squares | df | Mean Square | F       | Sig. |
|----------------|----------------|----|-------------|---------|------|
| Between Groups | 24950.598      | 7  | 3564.371    | 161.449 | .000 |
| Within Groups  | 176.619        | 8  | 22.077      |         |      |
| Total          | 25127.216      | 15 |             |         |      |

##### Duncan<sup>a</sup>

|                 |   | Subset for alpha = 0.05 |         |         |         |          |
|-----------------|---|-------------------------|---------|---------|---------|----------|
| TLPE extract    | N | 1                       | 2       | 3       | 4       | 5        |
| 12              | 2 | .8395                   |         |         |         |          |
| 10              | 2 | 1.0505                  |         |         |         |          |
| 30              | 2 | 1.1230                  |         |         |         |          |
| 15              | 2 | 1.3100                  |         |         |         |          |
| 9               | 2 |                         | 14.8365 |         |         |          |
| 7.5             | 2 |                         |         | 60.9085 |         |          |
| 3.75            | 2 |                         |         |         | 85.9390 |          |
| solvent control | 2 |                         |         |         |         | 100.0000 |
| Sig.            |   | .927                    | 1.000   | 1.000   | 1.000   | 1.000    |

Means for groups in homogeneous subsets are displayed.

a. Uses Harmonic Mean Sample Size = 2.000.

## 1.2 KKU-100 cells

### 1.2.1 24 h

#### ANOVA

#### KKU-100 cells

|                | Sum of Squares | df | Mean Square | F       | Sig. |
|----------------|----------------|----|-------------|---------|------|
| Between Groups | 11818.836      | 5  | 2363.767    | 851.584 | .000 |
| Within Groups  | 16.654         | 6  | 2.776       |         |      |
| Total          | 11835.490      | 11 |             |         |      |

#### Duncan<sup>a</sup>

| TLPE extract    | N | Subset for alpha = 0.05 |         |         |         |          |
|-----------------|---|-------------------------|---------|---------|---------|----------|
|                 |   | 1                       | 2       | 3       | 4       | 5        |
| 500             | 2 | 3.7240                  |         |         |         |          |
| 250             | 2 |                         | 45.3245 |         |         |          |
| 125             | 2 |                         | 48.0310 |         |         |          |
| 62.5            | 2 |                         |         | 59.1465 |         |          |
| 31.25           | 2 |                         |         |         | 88.6560 |          |
| solvent control | 2 |                         |         |         |         | 100.0000 |
| Sig.            |   | 1.000                   | .155    | 1.000   | 1.000   | 1.000    |

Means for groups in homogeneous subsets are displayed.

a. Uses Harmonic Mean Sample Size = 2.000.

### 1.2.2 48 h

#### ANOVA

##### KKU-100 cells

|                | Sum of Squares | df | Mean Square | F      | Sig. |
|----------------|----------------|----|-------------|--------|------|
| Between Groups | 14701.493      | 7  | 2100.213    | 77.785 | .000 |
| Within Groups  | 216.002        | 8  | 27.000      |        |      |
| Total          | 14917.495      | 15 |             |        |      |

##### Duncan<sup>a</sup>

| TLPE extract    | N | Subset for alpha = 0.05 |         |         |          |
|-----------------|---|-------------------------|---------|---------|----------|
|                 |   | 1                       | 2       | 3       | 4        |
| 30              | 2 | 10.1025                 |         |         |          |
| 15              | 2 |                         | 40.3710 |         |          |
| 12              | 2 |                         |         | 61.5495 |          |
| 7.5             | 2 |                         |         |         | 91.1220  |
| 9               | 2 |                         |         |         | 91.4395  |
| 10              | 2 |                         |         |         | 91.5375  |
| 3.75            | 2 |                         |         |         | 94.4315  |
| solvent control | 2 |                         |         |         | 100.0000 |
| Sig.            |   | 1.000                   | 1.000   | 1.000   | .150     |

Means for groups in homogeneous subsets are displayed.

a. Uses Harmonic Mean Sample Size = 2.000.

### 1.2.3 72 h

#### ANOVA

##### KKU-100 cells

|                | Sum of Squares | df | Mean Square | F       | Sig. |
|----------------|----------------|----|-------------|---------|------|
| Between Groups | 25156.769      | 7  | 3593.824    | 606.081 | .000 |
| Within Groups  | 47.437         | 8  | 5.930       |         |      |
| Total          | 25204.206      | 15 |             |         |      |

##### Duncan<sup>a</sup>

| TLPE extract    | N | Subset for alpha = 0.05 |         |         |         |          |
|-----------------|---|-------------------------|---------|---------|---------|----------|
|                 |   | 1                       | 2       | 3       | 4       | 5        |
| 30              | 2 | 1.6850                  |         |         |         |          |
| 15              | 2 | 3.7245                  |         |         |         |          |
| 12              | 2 | 5.8330                  |         |         |         |          |
| 10              | 2 |                         | 24.3595 |         |         |          |
| 9               | 2 |                         |         | 43.3820 |         |          |
| 7.5             | 2 |                         |         |         | 67.0135 |          |
| solvent control | 2 |                         |         |         |         | 100.0000 |
| 3.75            | 2 |                         |         |         |         | 104.4775 |
| Sig.            |   | .141                    | 1.000   | 1.000   | 1.000   | .103     |

Means for groups in homogeneous subsets are displayed.

a. Uses Harmonic Mean Sample Size = 2.000.

### 1.3 H69 cells

#### 1.3.1 24 h

#### ANOVA

#### H69 cells

|                | Sum of Squares | df | Mean Square | F       | Sig. |
|----------------|----------------|----|-------------|---------|------|
| Between Groups | 11013.466      | 5  | 2202.693    | 224.285 | .000 |
| Within Groups  | 58.926         | 6  | 9.821       |         |      |
| Total          | 11072.391      | 11 |             |         |      |

#### Duncan<sup>a</sup>

|                 |   | Subset for alpha = 0.05 |         |         |         |         |          |
|-----------------|---|-------------------------|---------|---------|---------|---------|----------|
| TLPE extract    | N | 1                       | 2       | 3       | 4       | 5       | 6        |
| 500             | 2 | 16.8755                 |         |         |         |         |          |
| 250             | 2 |                         | 30.5060 |         |         |         |          |
| 125             | 2 |                         |         | 53.2495 |         |         |          |
| 62.5            | 2 |                         |         |         | 77.7240 |         |          |
| 31.25           | 2 |                         |         |         |         | 88.7365 |          |
| solvent control | 2 |                         |         |         |         |         | 100.0000 |
| Sig.            |   | 1.000                   | 1.000   | 1.000   | 1.000   | 1.000   | 1.000    |

Means for groups in homogeneous subsets are displayed.

a. Uses Harmonic Mean Sample Size = 2.000.

### 1.3.2 48 h

#### ANOVA

##### H69 cells

|                | Sum of Squares | df | Mean Square | F      | Sig. |
|----------------|----------------|----|-------------|--------|------|
| Between Groups | 6515.345       | 7  | 930.764     | 86.997 | .000 |
| Within Groups  | 85.590         | 8  | 10.699      |        |      |
| Total          | 6600.936       | 15 |             |        |      |

##### Duncan<sup>a</sup>

| TLPE extract    | N | Subset for alpha = 0.05 |         |         |         |         |          |
|-----------------|---|-------------------------|---------|---------|---------|---------|----------|
|                 |   | 1                       | 2       | 3       | 4       | 5       | 6        |
| 30              | 2 | 22.5375                 |         |         |         |         |          |
| 15              | 2 |                         | 48.6780 |         |         |         |          |
| 12              | 2 |                         | 54.9245 | 54.9245 |         |         |          |
| 10              | 2 |                         | 56.0240 | 56.0240 |         |         |          |
| 9               | 2 |                         |         | 60.2800 | 60.2800 |         |          |
| 7.5             | 2 |                         |         |         | 63.9675 | 63.9675 |          |
| 3.75            | 2 |                         |         |         |         | 68.4805 |          |
| solvent control | 2 |                         |         |         |         |         | 100.0000 |
| Sig.            |   | 1.000                   | .063    | .155    | .292    | .205    | 1.000    |

Means for groups in homogeneous subsets are displayed.

a. Uses Harmonic Mean Sample Size = 2.000.



### 1.3.3 72 h

#### ANOVA

##### H69 cells

|                | Sum of Squares | df | Mean Square | F      | Sig. |
|----------------|----------------|----|-------------|--------|------|
| Between Groups | 9573.510       | 7  | 1367.644    | 37.695 | .000 |
| Within Groups  | 290.256        | 8  | 36.282      |        |      |
| Total          | 9863.766       | 15 |             |        |      |

##### Duncan<sup>a</sup>

| TLPE extract    | N | Subset for alpha = 0.05 |         |         |         |          |
|-----------------|---|-------------------------|---------|---------|---------|----------|
|                 |   | 1                       | 2       | 3       | 4       | 5        |
| 30              | 2 | 12.2630                 |         |         |         |          |
| 15              | 2 |                         | 38.9850 |         |         |          |
| 12              | 2 |                         | 49.5545 | 49.5545 |         |          |
| 10              | 2 |                         |         | 62.6040 | 62.6040 |          |
| 9               | 2 |                         |         | 63.1185 | 63.1185 |          |
| 7.5             | 2 |                         |         |         | 68.3125 |          |
| 3.75            | 2 |                         |         |         | 76.7465 |          |
| solvent control | 2 |                         |         |         |         | 100.0000 |
| Sig.            |   | 1.000                   | .117    | .063    | .059    | 1.000    |

Means for groups in homogeneous subsets are displayed.

a. Uses Harmonic Mean Sample Size = 2.000.

## 2. SPSS data of cell cycle arrest analysis on K KU-M213B, K KU-100, and H69 cell lines.

### 2.1 K KU-M213B cells

#### 2.1.1 SubG1 phase

#### ANOVA

#### K KU-M213B cells

|                | Sum of Squares | df | Mean Square | F      | Sig. |
|----------------|----------------|----|-------------|--------|------|
| Between Groups | 197.994        | 3  | 65.998      | 28.401 | .004 |
| Within Groups  | 9.295          | 4  | 2.324       |        |      |
| Total          | 207.289        | 7  |             |        |      |

#### Duncan<sup>a</sup>

| TLPE extract    | N | Subset for alpha = 0.05 |         |         |
|-----------------|---|-------------------------|---------|---------|
|                 |   | 1                       | 2       | 3       |
| solvent control | 2 | 6.6000                  |         |         |
| 31.25           | 2 |                         | 12.2500 |         |
| 62.5            | 2 |                         |         | 17.0500 |
| 125             | 2 |                         |         | 19.6500 |
| Sig.            |   | 1.000                   | 1.000   | .163    |

Means for groups in homogeneous subsets are displayed.

a. Uses Harmonic Mean Sample Size = 2.000.

### 2.1.2 G0/G1 phase

#### ANOVA

##### KKU-M213B cells

|                | Sum of Squares | df | Mean Square | F      | Sig. |
|----------------|----------------|----|-------------|--------|------|
| Between Groups | 147.724        | 3  | 49.241      | 37.128 | .002 |
| Within Groups  | 5.305          | 4  | 1.326       |        |      |
| Total          | 153.029        | 7  |             |        |      |

##### Duncan<sup>a</sup>

| TLPE extract    | N | Subset for alpha = 0.05 |         |
|-----------------|---|-------------------------|---------|
|                 |   | 1                       | 2       |
| 125             | 2 | 67.9000                 |         |
| 62.5            | 2 |                         | 77.2500 |
| 31.25           | 2 |                         | 77.4000 |
| solvent control | 2 |                         | 78.6000 |
| Sig.            |   | 1.000                   | .312    |

Means for groups in homogeneous subsets are displayed.

a. Uses Harmonic Mean Sample Size = 2.000.

### 2.1.3 S phase

#### ANOVA

##### KKU-M213B cells

|                | Sum of Squares | df | Mean Square | F     | Sig. |
|----------------|----------------|----|-------------|-------|------|
| Between Groups | 6.664          | 3  | 2.221       | 6.415 | .052 |
| Within Groups  | 1.385          | 4  | .346        |       |      |
| Total          | 8.049          | 7  |             |       |      |

##### Duncan<sup>a</sup>

| TLPE extract    | N | Subset for alpha = 0.05 |        |
|-----------------|---|-------------------------|--------|
|                 |   | 1                       | 2      |
| 62.5            | 2 | 2.9000                  |        |
| 31.25           | 2 | 4.4000                  | 4.4000 |
| solvent control | 2 | 4.5000                  | 4.5000 |
| 125             | 2 |                         | 5.4500 |
| Sig.            |   | .056                    | .154   |

Means for groups in homogeneous subsets are displayed.

a. Uses Harmonic Mean Sample Size = 2.000.

### 2.1.4 G2/M phase

#### ANOVA

##### KKU-M213B cells

|                | Sum of Squares | df | Mean Square | F     | Sig. |
|----------------|----------------|----|-------------|-------|------|
| Between Groups | 58.650         | 3  | 19.550      | 9.082 | .029 |
| Within Groups  | 8.610          | 4  | 2.153       |       |      |
| Total          | 67.260         | 7  |             |       |      |

##### Duncan<sup>a</sup>

| TLPE extract    | N | Subset for alpha = 0.05 |         |
|-----------------|---|-------------------------|---------|
|                 |   | 1                       | 2       |
| 62.5            | 2 | 2.7000                  |         |
| 31.25           | 2 | 5.8500                  |         |
| 125             | 2 | 6.7500                  | 6.7500  |
| solvent control | 2 |                         | 10.3000 |
| Sig.            |   | .054                    | .073    |

Means for groups in homogeneous subsets are displayed.

a. Uses Harmonic Mean Sample Size = 2.000.

## 2.2 K KU-100 cells

### 2.2.1 SubG1 phase

#### ANOVA

#### K KU-100 cells

|                | Sum of Squares | df | Mean Square | F       | Sig. |
|----------------|----------------|----|-------------|---------|------|
| Between Groups | 55.634         | 3  | 18.545      | 449.566 | .000 |
| Within Groups  | .165           | 4  | .041        |         |      |
| Total          | 55.799         | 7  |             |         |      |

#### Duncan<sup>a</sup>

| TLPE extract    | N | Subset for alpha = 0.05 |        |        |
|-----------------|---|-------------------------|--------|--------|
|                 |   | 1                       | 2      | 3      |
| solvent control | 2 | .8000                   |        |        |
| 31.25           | 2 | 1.3000                  | 1.3000 |        |
| 62.5            | 2 |                         | 1.6500 |        |
| 125             | 2 |                         |        | 7.3000 |
| Sig.            |   | .070                    | .160   | 1.000  |

Means for groups in homogeneous subsets are displayed.

a. Uses Harmonic Mean Sample Size = 2.000.

### 2.2.2 G0/G1 phase

#### ANOVA

##### KKU-100 cells

|                | Sum of Squares | df | Mean Square | F      | Sig. |
|----------------|----------------|----|-------------|--------|------|
| Between Groups | 202.690        | 3  | 67.563      | 34.166 | .003 |
| Within Groups  | 7.910          | 4  | 1.977       |        |      |
| Total          | 210.600        | 7  |             |        |      |

##### Duncan<sup>a</sup>

| TLPE extract    | N | Subset for alpha = 0.05 |         |
|-----------------|---|-------------------------|---------|
|                 |   | 1                       | 2       |
| solvent control | 2 | 72.0000                 |         |
| 31.25           | 2 |                         | 82.9000 |
| 62.5            | 2 |                         | 83.1500 |
| 125             | 2 |                         | 84.5500 |
| Sig.            |   | 1.000                   | .312    |

Means for groups in homogeneous subsets are displayed.

a. Uses Harmonic Mean Sample Size = 2.000.

### 2.2.3 S phase

#### ANOVA

##### KKU-100 cells

|                | Sum of Squares | df | Mean Square | F      | Sig. |
|----------------|----------------|----|-------------|--------|------|
| Between Groups | 72.024         | 3  | 24.008      | 35.241 | .002 |
| Within Groups  | 2.725          | 4  | .681        |        |      |
| Total          | 74.749         | 7  |             |        |      |

##### Duncan<sup>a</sup>

| TLPE extract    | N | Subset for alpha = 0.05 |        |         |
|-----------------|---|-------------------------|--------|---------|
|                 |   | 1                       | 2      | 3       |
| 125             | 2 | 3.9500                  |        |         |
| 62.5            | 2 |                         | 6.4000 |         |
| 31.25           | 2 |                         | 7.9000 |         |
| solvent control | 2 |                         |        | 12.2000 |
| Sig.            |   | 1.000                   | .143   | 1.000   |

Means for groups in homogeneous subsets are displayed.

a. Uses Harmonic Mean Sample Size = 2.000.



### 2.2.4 G2/M phase

#### ANOVA

##### KKU-100 cells

|                | Sum of Squares | df | Mean Square | F      | Sig. |
|----------------|----------------|----|-------------|--------|------|
| Between Groups | 110.704        | 3  | 36.901      | 13.316 | .015 |
| Within Groups  | 11.085         | 4  | 2.771       |        |      |
| Total          | 121.789        | 7  |             |        |      |

##### Duncan<sup>a</sup>

| TLPE extract    | N | Subset for alpha = 0.05 |         |
|-----------------|---|-------------------------|---------|
|                 |   | 1                       | 2       |
| 125             | 2 | 4.2000                  |         |
| 62.5            | 2 | 7.4500                  |         |
| 31.25           | 2 | 7.5000                  |         |
| solvent control | 2 |                         | 14.4000 |
| Sig.            |   | .124                    | 1.000   |

Means for groups in homogeneous subsets are displayed.

a. Uses Harmonic Mean Sample Size = 2.000.

## 2.3 H69 cells

### 2.3.1 SubG1

#### ANOVA

#### H69 cells

|                | Sum of Squares | df | Mean Square | F      | Sig. |
|----------------|----------------|----|-------------|--------|------|
| Between Groups | 38.925         | 3  | 12.975      | 21.535 | .006 |
| Within Groups  | 2.410          | 4  | .603        |        |      |
| Total          | 41.335         | 7  |             |        |      |

#### Duncan<sup>a</sup>

| TLPE            | N | Subset for alpha = 0.05 |        |
|-----------------|---|-------------------------|--------|
|                 |   | 1                       | 2      |
| solvent control | 2 | 3.7000                  |        |
| 31.25           | 2 |                         | 7.3500 |
| 62.5            | 2 |                         | 8.5000 |
| 125             | 2 |                         | 9.5500 |
| Sig.            |   | 1.000                   | .050   |

Means for groups in homogeneous subsets are displayed.

a. Uses Harmonic Mean Sample Size = 2.000.

### 2.3.2 G0/G1 phase

#### ANOVA

##### H69 cells

|                | Sum of Squares | df | Mean Square | F     | Sig. |
|----------------|----------------|----|-------------|-------|------|
| Between Groups | 28.084         | 3  | 9.361       | 1.407 | .363 |
| Within Groups  | 26.605         | 4  | 6.651       |       |      |
| Total          | 54.689         | 7  |             |       |      |

##### Duncan<sup>a</sup>

| TLPE extract    | N | Subset for alpha = 0.05 |
|-----------------|---|-------------------------|
| solvent control | 2 | 1                       |
| 31.25           | 2 | 46.2500                 |
| 125             | 2 | 48.4000                 |
| 62.5            | 2 | 49.1000                 |
| Sig.            |   | 51.5000                 |
|                 |   | .117                    |

Means for groups in homogeneous subsets are displayed.

a. Uses Harmonic Mean Sample Size = 2.000.

### 2.3.3 S phase

#### ANOVA

##### H69 cells

|                | Sum of Squares | df | Mean Square | F    | Sig. |
|----------------|----------------|----|-------------|------|------|
| Between Groups | .664           | 3  | .221        | .009 | .999 |
| Within Groups  | 103.645        | 4  | 25.911      |      |      |
| Total          | 104.309        | 7  |             |      |      |

##### Duncan<sup>a</sup>

| TLPE extract    | N | Subset for alpha =<br>0.05<br>1 |
|-----------------|---|---------------------------------|
| 62.5            | 2 | 14.5000                         |
| solvent control | 2 | 14.8500                         |
| 31.25           | 2 | 15.0000                         |
| 125             | 2 | 15.3000                         |
| Sig.            |   | .883                            |

Means for groups in homogeneous subsets are displayed.

a. Uses Harmonic Mean Sample Size = 2.000.

### 2.3.4 G2/M phase

#### ANOVA

##### H69 cells

|                | Sum of Squares | df | Mean Square | F    | Sig. |
|----------------|----------------|----|-------------|------|------|
| Between Groups | 79.495         | 3  | 26.498      | .579 | .659 |
| Within Groups  | 183.000        | 4  | 45.750      |      |      |
| Total          | 262.495        | 7  |             |      |      |

##### Duncan<sup>a</sup>

|                 |   | Subset for alpha =<br>0.05 |
|-----------------|---|----------------------------|
| TLPE extract    | N | 1                          |
| 62.5            | 2 | 23.7000                    |
| 125             | 2 | 24.1000                    |
| 31.25           | 2 | 26.9000                    |
| solvent control | 2 | 31.6000                    |
| Sig.            |   | .312                       |

Means for groups in homogeneous subsets are displayed.

a. Uses Harmonic Mean Sample Size = 2.000.

### 3. SPSS data of apoptosis analysis on KKKU-M213B, KKKU-100, and H69 cell lines.

#### 3.1 KKKU-M213B cells

##### ANOVA

##### KKU-M213B cells

|                | Sum of Squares | df | Mean Square | F      | Sig. |
|----------------|----------------|----|-------------|--------|------|
| Between Groups | 434.674        | 4  | 108.669     | 20.870 | .003 |
| Within Groups  | 26.035         | 5  | 5.207       |        |      |
| Total          | 460.709        | 9  |             |        |      |

##### Duncan<sup>a</sup>

| TLPE extract    | N | Subset for alpha = 0.05 |         |         |
|-----------------|---|-------------------------|---------|---------|
|                 |   | 1                       | 2       | 3       |
| solvent control | 2 | 5.5000                  |         |         |
| 31.25           | 2 |                         | 12.0500 |         |
| 62.5            | 2 |                         | 15.5500 |         |
| camp            | 2 |                         | 16.6000 |         |
| 125             | 2 |                         |         | 25.7500 |
| Sig.            |   | 1.000                   | .110    | 1.000   |

Means for groups in homogeneous subsets are displayed.

a. Uses Harmonic Mean Sample Size = 2.000.

### 3.2 KKU-100 cells

#### ANOVA

##### KKU-100 cells

|                | Sum of Squares | df | Mean Square | F      | Sig. |
|----------------|----------------|----|-------------|--------|------|
| Between Groups | 1245.914       | 4  | 311.478     | 29.137 | .001 |
| Within Groups  | 53.450         | 5  | 10.690      |        |      |
| Total          | 1299.364       | 9  |             |        |      |

##### Duncan<sup>a</sup>

| TLPE extract    | N | Subset for alpha = 0.05 |         |         |
|-----------------|---|-------------------------|---------|---------|
|                 |   | 1                       | 2       | 3       |
| solvent control | 2 | 5.7000                  |         |         |
| 31.25           | 2 | 10.4500                 | 10.4500 |         |
| 62.5            | 2 | 11.7000                 | 11.7000 |         |
| 125             | 2 |                         | 17.7500 |         |
| camp            | 2 |                         |         | 37.6000 |
| Sig.            |   | .134                    | .082    | 1.000   |

Means for groups in homogeneous subsets are displayed.

a. Uses Harmonic Mean Sample Size = 2.000.

### 3.3 H69 cells

#### ANOVA

##### H69 cells

|                | Sum of Squares | df | Mean Square | F      | Sig. |
|----------------|----------------|----|-------------|--------|------|
| Between Groups | 267.396        | 4  | 66.849      | 52.389 | .000 |
| Within Groups  | 6.380          | 5  | 1.276       |        |      |
| Total          | 273.776        | 9  |             |        |      |

##### Duncan<sup>a</sup>

| TLPE extract    | N | Subset for alpha = 0.05 |        |         |
|-----------------|---|-------------------------|--------|---------|
|                 |   | 1                       | 2      | 3       |
| solvent control | 2 | 3.5500                  |        |         |
| 31.25           | 2 | 4.9000                  | 4.9000 |         |
| 62.5            | 2 | 6.3500                  | 6.3500 |         |
| 125             | 2 |                         | 7.2500 |         |
| camp            | 2 |                         |        | 18.0500 |
| Sig.            |   | .061                    | .099   | 1.000   |

Means for groups in homogeneous subsets are displayed.

a. Uses Harmonic Mean Sample Size = 2.000.



#### 4. SPSS data of western blot analysis on KKU-M213B and KKU-100 cell lines.

##### 4.1 KKU-M213B cells

###### 4.1.1 Ac-H3

#### ANOVA

##### KKU-M213B cells

|                | Sum of Squares | df | Mean Square | F      | Sig. |
|----------------|----------------|----|-------------|--------|------|
| Between Groups | .599           | 3  | .200        | 28.285 | .004 |
| Within Groups  | .028           | 4  | .007        |        |      |
| Total          | .628           | 7  |             |        |      |

##### Duncan<sup>a</sup>

|                 |   | Subset for alpha = 0.05 |        |        |
|-----------------|---|-------------------------|--------|--------|
| TLPE extract    | N | 1                       | 2      | 3      |
| 31.25           | 2 | .9145                   |        |        |
| solvent control | 2 | 1.0000                  | 1.0000 |        |
| 62.5            | 2 |                         | 1.1675 |        |
| 125             | 2 |                         |        | 1.6235 |
| Sig.            |   | .367                    | .117   | 1.000  |

Means for groups in homogeneous subsets are displayed.

a. Uses Harmonic Mean Sample Size = 2.000.

###### 4.1.2 P21

#### ANOVA

##### KKU-M213B cells

|                | Sum of Squares | df | Mean Square | F | Sig. |
|----------------|----------------|----|-------------|---|------|
| Between Groups | .000           | 3  | .000        | . | .    |
| Within Groups  | .000           | 4  | .000        |   |      |
| Total          | .000           | 7  |             |   |      |

### 4.1.3 CDK4

#### ANOVA

##### KKU-M213B cells

|                | Sum of Squares | df | Mean Square | F       | Sig. |
|----------------|----------------|----|-------------|---------|------|
| Between Groups | .096           | 3  | .032        | 183.899 | .000 |
| Within Groups  | .001           | 4  | .000        |         |      |
| Total          | .096           | 7  |             |         |      |

##### Duncan<sup>a</sup>

| TLPE extract    | N | Subset for alpha = 0.05 |       |        |
|-----------------|---|-------------------------|-------|--------|
|                 |   | 1                       | 2     | 3      |
| 125             | 2 | .7200                   |       |        |
| 62.5            | 2 | .7475                   |       |        |
| 31.25           | 2 |                         | .8040 |        |
| solvent control | 2 |                         |       | 1.0000 |
| Sig.            |   | .105                    | 1.000 | 1.000  |

Means for groups in homogeneous subsets are displayed.

a. Uses Harmonic Mean Sample Size = 2.000.

#### 4.1.4 P53

#### ANOVA

##### KKU-M213B cells

|                | Sum of Squares | df | Mean Square | F      | Sig. |
|----------------|----------------|----|-------------|--------|------|
| Between Groups | .691           | 3  | .230        | 14.130 | .014 |
| Within Groups  | .065           | 4  | .016        |        |      |
| Total          | .756           | 7  |             |        |      |

##### Duncan<sup>a</sup>

| TLPE extract    | N | Subset for alpha = 0.05 |        |
|-----------------|---|-------------------------|--------|
|                 |   | 1                       | 2      |
| 125             | 2 | .2580                   |        |
| 62.5            | 2 | .5275                   |        |
| 31.25           | 2 |                         | .8855  |
| solvent control | 2 |                         | 1.0000 |
| Sig.            |   | .102                    | .420   |

Means for groups in homogeneous subsets are displayed.

a. Uses Harmonic Mean Sample Size = 2.000.

#### 4.1.5 Bax

#### ANOVA

##### KKU-M213B cells

|                | Sum of Squares | df | Mean Square | F     | Sig. |
|----------------|----------------|----|-------------|-------|------|
| Between Groups | .202           | 3  | .067        | 1.525 | .338 |
| Within Groups  | .176           | 4  | .044        |       |      |
| Total          | .378           | 7  |             |       |      |

##### Duncan<sup>a</sup>

| factor | N | Subset for alpha = 0.05 |
|--------|---|-------------------------|
|        |   | 1                       |
| 4.00   | 2 | .6110                   |
| 3.00   | 2 | .6120                   |
| 2.00   | 2 | .7575                   |
| 1.00   | 2 | 1.0000                  |
| Sig.   |   | .143                    |

Means for groups in homogeneous subsets are displayed.

a. Uses Harmonic Mean Sample Size = 2.000.

#### 4.1.6 Bcl2

#### ANOVA

##### KKU-M213B cells

|                | Sum of Squares | df | Mean Square | F     | Sig. |
|----------------|----------------|----|-------------|-------|------|
| Between Groups | 1.027          | 3  | .342        | 6.414 | .052 |
| Within Groups  | .214           | 4  | .053        |       |      |
| Total          | 1.241          | 7  |             |       |      |

##### Duncan<sup>a</sup>

| factor | N | Subset for alpha = 0.05 |        |
|--------|---|-------------------------|--------|
|        |   | 1                       | 2      |
| 4.00   | 2 | .0925                   |        |
| 3.00   | 2 | .5610                   | .5610  |
| 2.00   | 2 |                         | .9195  |
| 1.00   | 2 |                         | 1.0000 |
| Sig.   |   | .113                    | .135   |

Means for groups in homogeneous subsets are displayed.

a. Uses Harmonic Mean Sample Size = 2.000.

#### 4.1.7 pERK

##### ANOVA

##### KKU-M213B cells

|                | Sum of Squares | df | Mean Square | F      | Sig. |
|----------------|----------------|----|-------------|--------|------|
| Between Groups | .358           | 3  | .119        | 48.030 | .001 |
| Within Groups  | .010           | 4  | .002        |        |      |
| Total          | .368           | 7  |             |        |      |

##### Duncan<sup>a</sup>

| TLPE extract    | N | Subset for alpha = 0.05 |        |
|-----------------|---|-------------------------|--------|
|                 |   | 1                       | 2      |
| 125             | 2 | .5100                   |        |
| 62.5            | 2 | .6330                   |        |
| 31.25           | 2 |                         | .9700  |
| solvent control | 2 |                         | 1.0000 |
| Sig.            |   | .069                    | .580   |

Means for groups in homogeneous subsets are displayed.

a. Uses Harmonic Mean Sample Size = 2.000.

## 4.2 K KU-100 cells

### 4.2.1 Ac-H3

#### ANOVA

#### K KU-100 cells

|                | Sum of Squares | df | Mean Square | F      | Sig. |
|----------------|----------------|----|-------------|--------|------|
| Between Groups | 94.069         | 3  | 31.356      | 89.174 | .000 |
| Within Groups  | 1.407          | 4  | .352        |        |      |
| Total          | 95.475         | 7  |             |        |      |

#### Duncan<sup>a</sup>

| TLPE extract    | N | Subset for alpha = 0.05 |        |
|-----------------|---|-------------------------|--------|
|                 |   | 1                       | 2      |
| solvent control | 2 | 1.0000                  |        |
| 31.25           | 2 | 1.0550                  |        |
| 62.5            | 2 | 2.5110                  |        |
| 125             | 2 |                         | 9.3165 |
| Sig.            |   | .067                    | 1.000  |

Means for groups in homogeneous subsets are displayed.

a. Uses Harmonic Mean Sample Size = 2.000.

#### 4.2.2 P21

#### ANOVA

##### KKU-100 cells

|                | Sum of Squares | df | Mean Square | F       | Sig. |
|----------------|----------------|----|-------------|---------|------|
| Between Groups | 73.876         | 3  | 24.625      | 121.567 | .000 |
| Within Groups  | .810           | 4  | .203        |         |      |
| Total          | 74.686         | 7  |             |         |      |

##### Duncan<sup>a</sup>

| TLPE extract    | N | Subset for alpha = 0.05 |        |        |
|-----------------|---|-------------------------|--------|--------|
|                 |   | 1                       | 2      | 3      |
| solvent control | 2 | 1.0000                  |        |        |
| 31.25           | 2 | 1.9975                  | 1.9975 |        |
| 62.5            | 2 |                         | 3.0800 |        |
| 125             | 2 |                         |        | 8.8350 |
| Sig.            |   | .091                    | .074   | 1.000  |

Means for groups in homogeneous subsets are displayed.

a. Uses Harmonic Mean Sample Size = 2.000.



### 4.2.3 CDK4

#### ANOVA

##### KKU-100 cells

|                | Sum of Squares | df | Mean Square | F      | Sig. |
|----------------|----------------|----|-------------|--------|------|
| Between Groups | .335           | 3  | .112        | 10.871 | .022 |
| Within Groups  | .041           | 4  | .010        |        |      |
| Total          | .376           | 7  |             |        |      |

##### Duncan<sup>a</sup>

| TLPE extract    | N | Subset for alpha = 0.05 |        |
|-----------------|---|-------------------------|--------|
|                 |   | 1                       | 2      |
| 125             | 2 | .5055                   |        |
| 62.5            | 2 | .5230                   |        |
| 31.25           | 2 | .7915                   | .7915  |
| solvent control | 2 |                         | 1.0000 |
| Sig.            |   | .051                    | .109   |

Means for groups in homogeneous subsets are displayed.

a. Uses Harmonic Mean Sample Size = 2.000.

#### 4.2.4 P53

#### ANOVA

##### KKU-100 cells

|                | Sum of Squares | df | Mean Square | F     | Sig. |
|----------------|----------------|----|-------------|-------|------|
| Between Groups | .337           | 3  | .112        | 2.280 | .221 |
| Within Groups  | .197           | 4  | .049        |       |      |
| Total          | .534           | 7  |             |       |      |

##### Duncan<sup>a</sup>

| TLPE extract    | N | Subset for alpha = 0.05 |  |
|-----------------|---|-------------------------|--|
|                 |   | 1                       |  |
| 125             | 2 | .4740                   |  |
| 62.5            | 2 | .5530                   |  |
| 31.25           | 2 | .7770                   |  |
| solvent control | 2 | 1.0000                  |  |
| Sig.            |   | .082                    |  |

Means for groups in homogeneous subsets are displayed.

a. Uses Harmonic Mean Sample Size = 2.000.

#### 4.2.5 Bax

##### ANOVA

##### KKU-100 cells

|                | Sum of Squares | df | Mean Square | F      | Sig. |
|----------------|----------------|----|-------------|--------|------|
| Between Groups | 3.831          | 3  | 1.277       | 44.506 | .002 |
| Within Groups  | .115           | 4  | .029        |        |      |
| Total          | 3.946          | 7  |             |        |      |

##### Duncan<sup>a</sup>

| TLPE extract    | N | Subset for alpha = 0.05 |        |        |
|-----------------|---|-------------------------|--------|--------|
|                 |   | 1                       | 2      | 3      |
| solvent control | 2 | 1.0000                  |        |        |
| 31.25           | 2 | 1.2705                  | 1.2705 |        |
| 62.5            | 2 |                         | 1.5710 |        |
| 125             | 2 |                         |        | 2.8090 |
| Sig.            |   | .186                    | .151   | 1.000  |

Means for groups in homogeneous subsets are displayed.

a. Uses Harmonic Mean Sample Size = 2.000.

#### 4.2.6 Bcl2

#### ANOVA

##### KKU-100 cells

|                | Sum of Squares | df | Mean Square | F     | Sig. |
|----------------|----------------|----|-------------|-------|------|
| Between Groups | .458           | 3  | .153        | 5.490 | .067 |
| Within Groups  | .111           | 4  | .028        |       |      |
| Total          | .569           | 7  |             |       |      |

##### Duncan<sup>a</sup>

| TLPE extract    | N | Subset for alpha = 0.05 |        |
|-----------------|---|-------------------------|--------|
|                 |   | 1                       | 2      |
| 125             | 2 | .5750                   |        |
| 62.5            | 2 | .6490                   |        |
| solvent control | 2 | 1.0000                  | 1.0000 |
| 31.25           | 2 |                         | 1.1510 |
| Sig.            |   | .067                    | .416   |

Means for groups in homogeneous subsets are displayed.

a. Uses Harmonic Mean Sample Size = 2.000.

#### 4.2.7 pERK

##### ANOVA

##### KKU-100 cells

|                | Sum of Squares | df | Mean Square | F       | Sig. |
|----------------|----------------|----|-------------|---------|------|
| Between Groups | .549           | 3  | .183        | 104.340 | .000 |
| Within Groups  | .007           | 4  | .002        |         |      |
| Total          | .556           | 7  |             |         |      |

##### Duncan<sup>a</sup>

| TLPE extract    | N | Subset for alpha = 0.05 |       |        |
|-----------------|---|-------------------------|-------|--------|
|                 |   | 1                       | 2     | 3      |
| 125             | 2 | .3485                   |       |        |
| 62.5            | 2 |                         | .7530 |        |
| 31.25           | 2 |                         |       | .9785  |
| solvent control | 2 |                         |       | 1.0000 |
| Sig.            |   | 1.000                   | 1.000 | .635   |

Means for groups in homogeneous subsets are displayed.

a. Uses Harmonic Mean Sample Size = 2.000.

#### 4.3 Bax/Bcl2 ratio of KKU-M213B cells

### ANOVA

|                | Sum of Squares | df | Mean Square | F      | Sig. |
|----------------|----------------|----|-------------|--------|------|
| Between Groups | 45.501         | 3  | 15.167      | 18.833 | .008 |
| Within Groups  | 3.221          | 4  | .805        |        |      |
| Total          | 48.723         | 7  |             |        |      |

Duncan<sup>a</sup>

| factor | N | Subset for alpha = 0.05 |        |
|--------|---|-------------------------|--------|
|        |   | 1                       | 2      |
| 2.00   | 2 | .8325                   |        |
| 1.00   | 2 | 1.0000                  |        |
| 3.00   | 2 | 1.1800                  |        |
| 4.00   | 2 |                         | 6.5045 |
| Sig.   |   | .721                    | 1.000  |

Means for groups in homogeneous subsets are displayed.

a. Uses Harmonic Mean Sample Size = 2.000.
